# Supplementary material
Source: PubMed Central journal article supplement (PMC10281931)
Supplement: 40121_2023_802_MOESM1_ESM.pdf [file 40121_2023_802_MOESM1_ESM.pdf]

## Supplementary Material

### Incidence of respiratory syncytial virus infection in older adults: limitations of current data

**Authors:** Mark H Rozenbaum,<sup>1</sup> Elizabeth Begier,<sup>2\*</sup> Samantha Kurosky,<sup>3</sup> Jo Whelan,<sup>4</sup> Danai Bem,<sup>4</sup> Koen B Pouwels,<sup>5</sup> Maarten Postma,<sup>6</sup> Louis Bont<sup>7</sup>

<sup>1</sup> Pfizer Inc, Capelle a/d IJssel, The Netherlands

<sup>2</sup> Pfizer Vaccines, Dublin, Ireland

<sup>3</sup> Pfizer Inc, New York, NY, USA

<sup>4</sup> HEOR Ltd, Cardiff, UK

<sup>5</sup> University of Oxford, Oxford, UK

<sup>6</sup> University of Groningen, Groningen, the Netherlands

<sup>7</sup> University Medical Center Utrecht, Utrecht, the Netherlands

\*Corresponding author

Email: [Elizabeth.Begier@pfizer.com](mailto:Elizabeth.Begier@pfizer.com)

Address: Pfizer Vaccines, Dublin, Ireland

**S1 Table. Ovid MEDLINE search strategies.**

Ovid MEDLINE(R) ALL: 1946 to January 03, 2022  
Searched: 04.01.22

| #                                                                                                                                                                                                  | Search Terms                                                                                                                                                                           | Results    |
|----------------------------------------------------------------------------------------------------------------------------------------------------------------------------------------------------|----------------------------------------------------------------------------------------------------------------------------------------------------------------------------------------|------------|
| <b>Disease terms</b>                                                                                                                                                                               |                                                                                                                                                                                        |            |
| 1                                                                                                                                                                                                  | exp Respiratory Syncytial Viruses/ or (respiratory syncytial virus\$ or human orthopneumovirus\$ or respirosyncytial virus\$ or respiro-syncytial virus\$ or RS virus\$ or RSV).ti,ab. | 20,463     |
| <b>Epidemiology terms</b>                                                                                                                                                                          |                                                                                                                                                                                        |            |
| 2                                                                                                                                                                                                  | Incidence/ or Epidemiology/ or Prevalence/                                                                                                                                             | 595,572    |
| 3                                                                                                                                                                                                  | (Incidence or epidemiolog\$ or prevalence or ?etiology or episode\$ or distribution\$).ti,ab.                                                                                          | 2,981,801  |
| 4                                                                                                                                                                                                  | or/2-3                                                                                                                                                                                 | 3,139,974  |
| <b>Study design terms*</b>                                                                                                                                                                         |                                                                                                                                                                                        |            |
| 5                                                                                                                                                                                                  | exp Cohort studies/ or exp Longitudinal Studies/ or exp Prospective Studies/ or exp Follow-Up Studies/ or exp Case-Control Studies/ or exp Case Reports/ or Observational study/       | 4,681,530  |
| 6                                                                                                                                                                                                  | (cohort\$ or (case\$ adj2 control\$) or (case\$ adj2 series) or (case\$ adj2 report\$) or (case\$ adj2 stud\$) or (observation\$ adj2 (stud\$ or report\$)) or surveillance).tw.       | 1,988,947  |
| 7                                                                                                                                                                                                  | or/5-6                                                                                                                                                                                 | 5,494,502  |
| <b>Combine terms (Disease AND epidemiology AND study design)</b>                                                                                                                                   |                                                                                                                                                                                        |            |
| 8                                                                                                                                                                                                  | 1 and 4 and 7                                                                                                                                                                          | 1,946      |
| <b>Limit to English language and publication date</b>                                                                                                                                              |                                                                                                                                                                                        |            |
| 9                                                                                                                                                                                                  | limit 8 to (english language and yr="2017 -Current")                                                                                                                                   | 630        |
| <b>Total no. of studies identified</b>                                                                                                                                                             |                                                                                                                                                                                        | <b>630</b> |
| *Observational filter adapted from: Fraser C, Murray A, Burr J. Identifying observational studies of surgical interventions in MEDLINE and EMBASE. BMC Medical Research Methodology. 2006;6(1):41. |                                                                                                                                                                                        |            |

**S2 Table. Supplementary Table 4 Epistemonikos search strategy.**

**Epistemonikos ([www.epistemonikos.org](http://www.epistemonikos.org)): searched for relevant systematic literature reviews, up to 4 January 2022**  
**Searched: 7.2.22**

| Search                                                                                                                                                                                                                                                                                                                                                                                                                                                                                                                                                                                                                                                                                                                                                                                                                                                                                                                                                                                                                                                                                                                                                                                                                                                                                                                                                                                                                                                                                                                                                                                                                                                                                  | Results |
|-----------------------------------------------------------------------------------------------------------------------------------------------------------------------------------------------------------------------------------------------------------------------------------------------------------------------------------------------------------------------------------------------------------------------------------------------------------------------------------------------------------------------------------------------------------------------------------------------------------------------------------------------------------------------------------------------------------------------------------------------------------------------------------------------------------------------------------------------------------------------------------------------------------------------------------------------------------------------------------------------------------------------------------------------------------------------------------------------------------------------------------------------------------------------------------------------------------------------------------------------------------------------------------------------------------------------------------------------------------------------------------------------------------------------------------------------------------------------------------------------------------------------------------------------------------------------------------------------------------------------------------------------------------------------------------------|---------|
| <p>(title:(("respiratory syncytial virus*" OR "human orthopneumovirus*" OR "respirosyncytial virus*" OR "respiro-syncytial virus*" OR "RS virus*" OR RSV) OR abstract:(("respiratory syncytial virus*" OR "human orthopneumovirus*" OR "respirosyncytial virus*" OR "respiro-syncytial virus*" OR "RS virus*" OR RSV)) AND (title:(Incidence OR epidemiolog* OR prevalence OR aetiology OR etiology OR episode* OR distribution*) OR abstract:(Incidence OR epidemiolog* OR prevalence OR aetiology OR etiology OR episode* OR distribution*)) AND (title:(cohort* OR ((case*) AND (control* OR series OR report* OR stud*)) OR ((observation*) AND (stud* OR report*)) OR surveillance)) OR abstract:(cohort* OR ((case*) AND (control* OR series OR report* OR stud*)) OR ((observation*) AND (stud* OR report*)) OR surveillance)))) OR abstract:(("respiratory syncytial virus*" OR "human orthopneumovirus*" OR "respirosyncytial virus*" OR "respiro-syncytial virus*" OR "RS virus*" OR RSV) OR abstract:(("respiratory syncytial virus*" OR "human orthopneumovirus*" OR "respirosyncytial virus*" OR "respiro-syncytial virus*" OR "RS virus*" OR RSV)) AND (title:(Incidence OR epidemiolog* OR prevalence OR aetiology OR etiology OR episode* OR distribution*) OR abstract:(Incidence OR epidemiolog* OR prevalence OR aetiology OR etiology OR episode* OR distribution*)) AND (title:(cohort* OR ((case*) AND (control* OR series OR report* OR stud*)) OR ((observation*) AND (stud* OR report*)) OR surveillance)) OR abstract:(cohort* OR ((case*) AND (control* OR series OR report* OR stud*)) OR ((observation*) AND (stud* OR report*)) OR surveillance))))))</p> | 834     |
| Filtered to systematic reviews, 2019-2022                                                                                                                                                                                                                                                                                                                                                                                                                                                                                                                                                                                                                                                                                                                                                                                                                                                                                                                                                                                                                                                                                                                                                                                                                                                                                                                                                                                                                                                                                                                                                                                                                                               | 21      |

**S3 Table. Study characteristics of included studies.**

| <b>Author (year)</b>    | <b>Country</b> | <b>Study design</b>        | <b>Setting</b>             | <b>Study period</b>                                                                              | <b>Outcome</b> | <b>Symptoms required for inclusion</b>                                                                                                                                                                                                                                                                |
|-------------------------|----------------|----------------------------|----------------------------|--------------------------------------------------------------------------------------------------|----------------|-------------------------------------------------------------------------------------------------------------------------------------------------------------------------------------------------------------------------------------------------------------------------------------------------------|
| Belongia (2018)[1]      | USA            | Prospective, single centre | Primary and secondary care | Influenza seasons, 2004-2016                                                                     | Incidence      | Fever/feverishness or cough and ARI with cough (2011-2016)                                                                                                                                                                                                                                            |
| Bozio (2018)[2]         | USA            | Prospective, multicentre   | Secondary care             | January 2010-June 2012                                                                           | Proportion     | ARI and radiographically confirmed pneumonia                                                                                                                                                                                                                                                          |
| Branche (2014)[3]       | USA            | Prospective, single centre | Secondary care             | 4 winter seasons (November-May), 2008-2012                                                       | Proportion     | ARI                                                                                                                                                                                                                                                                                                   |
| Branche (2021)[4]       | USA            | Prospective, multicentre   | Secondary care             | 3 RSV seasons (October-April), 2017-2020                                                         | Incidence      | ≥2 ARI symptoms: fever ≥37.8°C or feeling feverish, new or worsening cough, new or worsening sputum production, new or worsening dyspnea, sore throat, runny nose/nasal congestion, and body aches or exacerbation of underlying cardiopulmonary disease preceded by ARI symptoms in the past 14 days |
| Brittain-Long (2010)[5] | Sweden         | Prospective, multicentre   | Secondary care             | 2 winter seasons (October-April), 2006-2008                                                      | Proportion     | Acute RTI: at least two of coryza, congestion, sneezing, sore throat, odynophagia, cough, chest pain, shortness of breath or fever, with no other explanation                                                                                                                                         |
| Camargo (2008)[6]       | USA            | Prospective, multicentre   | Secondary care             | Winter season, December 2003-April 2004                                                          | Prevalence     | AECOPD and any combination of increased cough, purulent sputum, dyspnea, fever, and chest congestion present for 10 days and a cigarette smoking history of 20 pack-years or more                                                                                                                     |
| Carrat (2006)[7]        | France         | Prospective, single centre | Secondary care             | 2 winter seasons, (October 2002-March 2003, November 2003-February 2004)                         | Prevalence     | Chronic cardiac or pulmonary disorders admitted to a CCU for acute respiratory or cardiac failure                                                                                                                                                                                                     |
| Charles (2008)[8]       | Australia      | Prospective, multicentre   | Secondary care             | 4 sites: 3 southern hemisphere winters, June 2004-September 2006<br>2 sites: June 2004-June 2005 | Proportion     | CAP: chest radiograph within 24 hours after hospital admission demonstrating features consistent with acute pneumonia and at least 2 symptoms consistent with pneumonia of fever or hypothermia, rigors, sweats, new cough with or without sputum, chest discomfort, or new-onset of dyspnea          |
| Chasqueira (2018)[9]    | Portugal       | Prospective, multicentre   | Elderly care centres       | November 2013-April 2014                                                                         | Prevalence     | ARI: sudden onset of symptoms, at least one respiratory symptom of cough, sore throat, shortness of breath and coryza, and a clinician's judgement that the illness was due to an infection                                                                                                           |

|                         |         |                              |                                                          |                                                                 |            |                                                                                                                                                                                                                                                                                                                                                              |
|-------------------------|---------|------------------------------|----------------------------------------------------------|-----------------------------------------------------------------|------------|--------------------------------------------------------------------------------------------------------------------------------------------------------------------------------------------------------------------------------------------------------------------------------------------------------------------------------------------------------------|
| Ciotti (2020)[10]       | Italy   | Retrospective, single centre | Secondary care                                           | October 2016-March 2019                                         | Proportion | Hospitalised with respiratory symptoms                                                                                                                                                                                                                                                                                                                       |
| Civljak (2019)[11]      | Croatia | Retrospective, single centre | Secondary care                                           | January 2016-June 2018                                          | Prevalence | ARI symptoms for at least 7 days                                                                                                                                                                                                                                                                                                                             |
| Creer (2005)[12]        | UK      | Prospective, multicentre     | Primary care                                             | May 2000-April 2001                                             | Proportion | Acute LRTI: new or worsening cough and at least one other lower respiratory tract symptom for which there was no other explanation, present for $\leq 21$ days                                                                                                                                                                                               |
| De Francesco (2021)[13] | Italy   | Retrospective, single centre | Secondary care                                           | January 2017-May 2021                                           | Prevalence | Respiratory symptoms: at least one of shortness of breath, sore throat, cough and fever $\geq 37.5^{\circ}\text{C}$                                                                                                                                                                                                                                          |
| De Serres (2009)[14]    | Canada  | Prospective, multicentre     | Secondary care                                           | 2 winter seasons, January 2003- May 2003, January 2004-May 2004 | Proportion | AECOPD: increase of respiratory symptoms (dyspnea, cough, and sputum) requiring an unscheduled medical visit $<10$ days after onset of symptoms                                                                                                                                                                                                              |
| Descamps (2021)[15]     | France  | Prospective, multicentre     | Secondary care                                           | 2 winter seasons, 2017-2019                                     | Prevalence | ILI: at least one systemic symptom of fever or feverishness, malaise, headache, myalgia or deterioration of general condition (asthenia or loss of weight or anorexia or confusion or dizziness) and at least one respiratory symptoms cough, sore throat or shortness of breath with onset $<7$ days before swabbing and hospitalised for at least 24 hours |
| Diaz-Decaro (2018)[16]  | USA     | Prospective, multicentre     | Skilled nursing home facilities (SNFs)                   | May 2015-July 2015                                              | Prevalence | ARI                                                                                                                                                                                                                                                                                                                                                          |
| Dimopoulos (2012)[17]   | Greece  | Prospective, single centre   | Tertiary care                                            | January 2008-December 2009                                      | Proportion | AECOPD: a change in "baseline" dyspnea, cough and sputum (beyond the normal day-to-day variation) usually requiring a modification in regular medication of a stable COPD course                                                                                                                                                                             |
| Falsey (2005)[18]       | USA     | Prospective, multicentre     | Community (healthy elderly persons and high-risk adults) | 4 winter seasons, 1999-2003                                     | Proportion | Symptoms of respiratory illness or worsening cardiopulmonary symptoms, nasal congestion, sore throat, hoarseness, new or worsening cough, sputum production, and dyspnea with or without fever                                                                                                                                                               |
| Falsey (2006)[19]       | USA     | Prospective, multicentre     | Secondary care                                           | RSV season (January-April), 2004                                | Proportion | Respiratory illness: one or more of nasal congestion, sore throat, hoarseness, cough, sputum production, dyspnea, wheezing, pleuritic chest pain and myalgias                                                                                                                                                                                                |

|                       |               |                              |                                                 |                                                  |            |                                                                                                                                                                                                                                                                                                   |
|-----------------------|---------------|------------------------------|-------------------------------------------------|--------------------------------------------------|------------|---------------------------------------------------------------------------------------------------------------------------------------------------------------------------------------------------------------------------------------------------------------------------------------------------|
| Falsey (2008)[20]     | USA           | Prospective, multicentre     | Long-term care facilities                       | 1998-2000                                        | Proportion | Respiratory symptoms                                                                                                                                                                                                                                                                              |
| Falsey (2014)[21]     | Multi-country | Prospective, multicentre     | Community                                       | November 2008-April 2009                         | Prevalence | Moderate-to-severe ILI: associated with pneumonia (based on signs and symptoms with a chest radiograph demonstrating a new or progressive infiltrate), or with hospitalisation, or with a maximum (the highest total score achieved on days 0–14) daily Influenza Symptom Severity (ISS) score >2 |
| Galli (2020)[22]      | Italy         | Prospective, multicentre     | Primary care and healthcare workers             | Influenza season, 2018 (week 46)-2019 (week 17)  | Proportion | ILI: sudden onset of symptoms, with at least one systemic (fever or feverishness, malaise, headache, and myalgia) and one respiratory (cough, sore throat, and shortness of breath) symptom                                                                                                       |
| Gaymard (2018)[23]    | France        | Retrospective, single centre | Virology laboratory                             | 4 RSV seasons, September 2010-April 2014         | Prevalence | ILI or RTI                                                                                                                                                                                                                                                                                        |
| Gimferrer (2019)[24]  | Spain         | Prospective, single centre   | Secondary and tertiary care                     | October 2013 (week 40)-March 2018 (week 9)       | Prevalence | clinical suspicion of viral respiratory infection                                                                                                                                                                                                                                                 |
| Glezen (2000)[25]     | USA           | Prospective, multicentre     | Secondary care                                  | July 1991-June 1995                              | Proportion | Acute respiratory conditions: pneumonia, tracheobronchitis, bronchiolitis, croup, exacerbations of asthma or COPD, and congestive heart failure                                                                                                                                                   |
| Hall (2001)[26]       | USA           | Prospective, multicentre     | Community (healthy working adults)              | RSV seasons, 1975-1995                           | Incidence  | Healthy working adults sampled regardless of symptoms                                                                                                                                                                                                                                             |
| Hause (2019)[27]      | USA           | Prospective, single centre   | Tertiary care (obstetric/gynaecological clinic) | November 2015-May 2016                           | Proportion | Pregnant women with an ARI                                                                                                                                                                                                                                                                        |
| Hirve (2020)[28]      | Multi-country | Multicentre                  | Primary care                                    | November 2017-June 2018                          | Proportion | ARI (outpatient): onset within past 10 days and at least one of cough, sore throat, shortness of breath or runny nose<br>SARI (in patient): overnight hospitalisation and onset within past 10 days of cough or shortness of breath<br>ILI: onset of cough within past 10 days                    |
| Hutchinson (2007)[29] | Australia     | Prospective                  | Community                                       | July-December 2003 and August 2004-December 2005 | Prevalence | COPD exacerbations: type I, an increase in dyspnoea, sputum volume and sputum purulence for more than 24 hours, Type II, any two of the above symptoms and Type III, one of the above                                                                                                             |

|                       |                          |                              |                            |                                                |            |                                                                                                                                                                                                                                                                                                                                                                   |
|-----------------------|--------------------------|------------------------------|----------------------------|------------------------------------------------|------------|-------------------------------------------------------------------------------------------------------------------------------------------------------------------------------------------------------------------------------------------------------------------------------------------------------------------------------------------------------------------|
|                       |                          |                              |                            |                                                |            | symptoms accompanied by sore throat and nasal discharge within 5 days, fever without other cause, increased cough and an increase in respiratory rate or heart rate 20% above baseline values                                                                                                                                                                     |
| Jackson (2021)[30]    | USA                      | Prospective, multicentre     | Secondary care             | Influenza season, November 2018-April 2019     | Incidence  | Medically attended ARI: ARI and Cough illness for less than 8 days                                                                                                                                                                                                                                                                                                |
| Jain (2015)[31]       | USA                      | Prospective, multicentre     | Secondary care             | January 2010-June 2012                         | Incidence  | Acute infection: fever or chills, documented fever or hypothermia, leukocytosis or leukopenia, or new altered mental status<br>ARI: new cough or sputum production, chest pain, dyspnea, tachypnea, abnormal lung examination, or respiratory failure<br>Radiographic evidence of pneumonia: the presence of consolidation, other infiltrate, or pleural effusion |
| Jeannoel (2019)[32]   | France                   | Retrospective, single centre | Secondary care             | 3 winter seasons (October to April), 2013-2016 | Proportion | Respiratory symptoms                                                                                                                                                                                                                                                                                                                                              |
| Johnstone (2008)[33]  | Canada                   | Prospective, multicentre     | Secondary care             | January 2004-January 2006                      | Proportion | CAP: acute LRTI with two or more of cough, productive cough, fever, chills, dyspnea, pleuritic chest pain, crackles, and bronchial breathing plus an opacity or infiltrate seen on a chest radiograph that was interpreted as pneumonia by the physician                                                                                                          |
| Johnstone (2014)[34]  | Canada                   | Prospective, multicentre     | Nursing homes              | 2009-2011                                      | Proportion | Respiratory symptoms: new symptoms of fever $\geq 38^{\circ}\text{C}$ , worsening cough, nasal congestion, sore throat, headache, sinus problems, muscle aches, fatigue, earache or infection, chills, not otherwise explained by an alternative                                                                                                                  |
| Juretschko (2017)[35] | USA                      | Prospective, multicentre     | Secondary care             | Influenza seasons, 2015-2016                   | Prevalence | Suspected RTI                                                                                                                                                                                                                                                                                                                                                     |
| Korsten (2021)[36]    | Belgium, UK, Netherlands | Prospective, multicentre     | Community and primary care | RSV seasons (October-May), 2017-2019           | Proportion | ARTI: one or more of nasal congestion or discharge, cough, wheezing, or shortness of breath                                                                                                                                                                                                                                                                       |
| Leli (2021)[37]       | Italy                    | Retrospective, single centre | Secondary care             | January 2016-June 2020                         | Prevalence | Symptoms of respiratory infection                                                                                                                                                                                                                                                                                                                                 |
| Loubet (2017)[38]     | France                   | Prospective, multicentre     | Secondary care             | 2012-2015                                      | Prevalence | ILI: at least one systemic symptom, fever $\geq 38^{\circ}\text{C}$ , headache, myalgia or malaise, and at least respiratory symptoms, cough, sore throat or dyspnoea for at least 24 hours with symptom onset $< 7$ days before sampling                                                                                                                         |

|                          |             |                            |                                          |                                                                         |            |                                                                                                                                                                                                                                                             |
|--------------------------|-------------|----------------------------|------------------------------------------|-------------------------------------------------------------------------|------------|-------------------------------------------------------------------------------------------------------------------------------------------------------------------------------------------------------------------------------------------------------------|
| Louie (2005)[39]         | USA         | Prospective, single centre | Secondary care                           | January-March 2002                                                      | Prevalence | ARI: new illness within the past 3 weeks with cough, sinus pain, congestion, sore throat, or fever                                                                                                                                                          |
| Malosh (2017)[40]        | USA         | Prospective, multicentre   | Secondary care                           | 2 influenza seasons, November 2014-March 2015, November 2015-April 2016 | Proportion | ARI                                                                                                                                                                                                                                                         |
| Marcos (2006)[41]        | Spain       | Prospective, single centre | Secondary care                           | January 2003-March 2004                                                 | Incidence  | CAP: presence of a new infiltrate on chest radiography with clinical symptoms suggestive of LRTI and no alternative diagnosis in a patient not admitted to hospital within the previous month and no alternative diagnosis was established during follow-up |
| McClure (2014)[42]       | USA         | Prospective, multicentre   | Primary and secondary care               | 4 influenza seasons, 2006-2010                                          | Incidence  | ARI: symptoms of fever/feverishness, chills, or cough                                                                                                                                                                                                       |
| Pellegrinelli (2020)[43] | Italy       | Retrospective, multicentre | Primary care                             | 4 winter/influenza seasons, 2014-2018                                   | Prevalence | ILI: abrupt onset of fever >38°C or feverishness, one or more respiratory symptoms, cough, sore throat and/or shortness of breath and one or more systemic symptoms, myalgia, headache and/or malaise                                                       |
| Poole (2020)[44]         | UK          | Prospective, multicentre   | Secondary and tertiary care              | March-May, 2015-2020                                                    | Proportion | ARI or suspected viral respiratory tract infection, recruited within 24 hours of presentation to hospital                                                                                                                                                   |
| Prasad (2020)[45]        | New Zealand | Retrospective, multicentre | Secondary care                           | Winter seasons (weeks 18-39), 2012-2015                                 | Incidence  | ARI (SARI or non-SARI)<br>SARI: cough and measured or reported fever within the last 7 days (2012) and within 10 days (from 2013)                                                                                                                           |
| Prasad (2021)[46]        | New Zealand | Prospective, multicentre   | Secondary care                           | Winter seasons, 2012-2015                                               | Prevalence | SARI: cough and measured or reported fever within the last 7 days (2012) and the last 10 days (2013-2015)                                                                                                                                                   |
| Price (2019)[47]         | Australia   | Prospective, multicentre   | Infectious Diseases Reference Laboratory | May 2002-December 2017                                                  | Proportion | Testing deemed clinically relevant                                                                                                                                                                                                                          |
| Reckziegel (2020)[48]    | Germany     | Prospective                | NR                                       | September 2009-December 2012                                            | Prevalence | RTI: common cold, cough with or without sputum, dyspnea, and fever                                                                                                                                                                                          |
| Saez-Lopez (2019)[49]    | Portugal    | Retrospective, multicentre | Primary and secondary care               | Winter seasons (week 40-week 20), 2010-2018                             | Proportion | ILI: sudden onset of at least one respiratory symptom, cough, sore throat, shortness of breath and at least one systemic symptom, fever or feverishness, malaise, headache or myalgia                                                                       |



|                       |          |                              |                                |                                                                             |                         |                                                                                                                                                                                                                                                             |
|-----------------------|----------|------------------------------|--------------------------------|-----------------------------------------------------------------------------|-------------------------|-------------------------------------------------------------------------------------------------------------------------------------------------------------------------------------------------------------------------------------------------------------|
| Saez-Lopez (2019)[50] | Portugal | Retrospective, multicentre   | Primary and secondary care     | 4 Influenza seasons (week 37-week 24), 2014-2018                            | Prevalence              | ILI<br>Respiratory infection (2017-2018)                                                                                                                                                                                                                    |
| Self (2016)[51]       | USA      | Prospective, multicentre     | Primary care                   | February 2011-June 2012                                                     | Prevalence              | Asymptomatic adults: absence of fever, cough, sore throat, wheeze, shortness of breath, rhinorrhea, ear pain, and vomiting for past 14 days and CAP patients: acute infection, ARI, and chest imaging showing consolidation, infiltrate or pleural effusion |
| Shorr (2018)[52]      | USA      | Prospective, single centre   | Community and secondary care   | January-December 2016                                                       | Prevalence              | Respiratory failure requiring MV in pneumonia patients                                                                                                                                                                                                      |
| Smithgall (2020)[53]  | USA      | Prospective, multicentre     | Primary care and community     | January 2013-December 2015                                                  | Proportion              | Hospitalised population: respiratory symptoms<br>Community: ARI $\geq 2$ symptoms of fever/feverishness, cough, sore throat, runny nose/nasal congestion or body aches or ILI                                                                               |
| Stamm (2021)[54]      | Germany  | Retrospective, single centre | Tertiary care                  | 2018-2021                                                                   | Incidence               | None specified; sample was patients who underwent testing for viral respiratory disease                                                                                                                                                                     |
| Subissi (2020)[55]    | Belgium  | Prospective, multicentre     | Secondary care                 | Influenza season (week 40-week 20), 2018-2019                               | Proportion              | SARI: ARI with fever $\geq 38^{\circ}\text{C}$ (or history of fever reported by patient) and cough or dyspnoea, with onset of symptoms within the past 10 days, requiring hospitalisation (minimum overnight)                                               |
| Subissi (2021)[56]    | Belgium  | Prospective, multicentre     | Primary and secondary care     | 4 Influenza seasons (week 40-week 20), 2015-2019                            | Incidence<br>Proportion | SARI: ARI with fever of $\geq 38^{\circ}\text{C}$ and with cough and/or dyspnoea within previous 10 days and overnight hospital stay<br>ILI: fever and cough or dyspnoea                                                                                    |
| Sumino (2010)[57]     | USA      | Prospective, single centre   | Secondary care                 | October 2005-October 2006                                                   | Prevalence              | ARI                                                                                                                                                                                                                                                         |
| Sundaram (2014)[58]   | USA      | Prospective, multicentre     | Primary and secondary care     | 2004-2005 to 2009-2010 (January-March, delayed to March-April in 2005-2006) | Proportion              | Medically attend ARI (2004 – 2007) and subsequently respiratory illness and at least 1 symptom: feverishness, chills, or cough                                                                                                                              |
| Tanner (2012)[59]     | UK       | Retrospective, single centre | Public health laboratory       | Winter season, 2009-2010                                                    | Proportion              | ARI                                                                                                                                                                                                                                                         |
| Tramuto (2021)[60]    | Italy    | Retrospective, multicentre   | Primary and secondary care     | 5 winter seasons (October-April), 2015-2020                                 | Prevalence              | ILI outpatients and SARI inpatients                                                                                                                                                                                                                         |
| Tsagarakis (2018)[61] | Greece   | Retrospective, multicentre   | Laboratories and tertiary care | 2015-2016                                                                   | Prevalence              | Symptomatic RTI                                                                                                                                                                                                                                             |

|                       |             |                            |                              |                                                                       |            |                                                                                                                                                                                                                                                                                                                                             |
|-----------------------|-------------|----------------------------|------------------------------|-----------------------------------------------------------------------|------------|---------------------------------------------------------------------------------------------------------------------------------------------------------------------------------------------------------------------------------------------------------------------------------------------------------------------------------------------|
| Ursic (2016)[62]      | Slovenia    | Prospective, single centre | Nursing home                 | December 2011-May 2012                                                | Incidence  | ARI                                                                                                                                                                                                                                                                                                                                         |
| Van Beek (2017)[63]   | Netherlands | Prospective, multicentre   | Community                    | 2 influenza seasons, December 2011-April 2012, October 2012- May 2013 | Incidence  | ILI: fever $\geq 37.8^{\circ}\text{C}$ with at least 1 other symptom of headache, myalgia, sore throat, coughing, rhinitis, or chest pain                                                                                                                                                                                                   |
| Varghese (2018)[64]   | Australia   | Retrospective, multicentre | Primary care                 | January 2010-December 2013                                            | Proportion | ILI: cough, fever and fatigue                                                                                                                                                                                                                                                                                                               |
| Vos (2018)[65]        | Netherlands | Prospective, multicentre   | Primary and secondary care   | 12 viral respiratory seasons, 2005 (week 30)-2017 (week 29)           | Incidence  | ILI or ARI                                                                                                                                                                                                                                                                                                                                  |
| Walsh (2004)[66]      | USA         | Prospective, single centre | Community and secondary care | 2 winter seasons (November-April), 1999-2001                          | Proportion | High-risk adults: symptomatic congestive heart failure (CHF): a physician's diagnosis or an ejection fraction $< 35\%$ or symptomatic pulmonary disease, primarily COPD<br>Hospitalised group: acute respiratory symptoms or diagnosis of underlying CHF or pulmonary disease<br>Healthy elderly persons: no disabling underlying illnesses |
| Wansaula (2016)[67]   | USA         | Prospective, multicentre   | Secondary care               | 2010(week 40)-2014(week 39)                                           | Proportion | SARI requiring hospitalisation: temperature $\geq 37.8^{\circ}\text{C}$ or subjective fever or chills, in addition to cough, sore throat, or shortness of breath                                                                                                                                                                            |
| Weinberger (2018)[68] | Germany     | Prospective, multicentre   | Primary care                 | October 2001-December 2004;<br>October 2002-December 2004             | Proportion | Long-lasting cough: coughed for 7 days or more                                                                                                                                                                                                                                                                                              |
| Widmer (2012)[69]     | USA         | Prospective, multicentre   | Secondary care               | Influenza seasons (November-April), 2006-2007, 2007-2008, 2008-2009   | Proportion | Hospitalised with any respiratory symptoms: cough, nasal congestion, coryza, dyspnea, or wheezing) or non-localising fever                                                                                                                                                                                                                  |
| Widmer (2014)[70]     | USA         | Prospective, multicentre   | Secondary care               | May 2009 - April 2010                                                 | Proportion | Any respiratory symptoms or non-localising fever beginning within 7 days before presentation                                                                                                                                                                                                                                                |
| Zambon (2001)[71]     | UK          | Prospective, multicentre   | Primary care                 | 3 winter seasons, 1995-1998                                           | Proportion | ILI: symptoms of fever, cough and respiratory tract-illness                                                                                                                                                                                                                                                                                 |

Abbreviations: ARI, acute respiratory illness; RSV, respiratory syncytial virus; ILI, influenza-like illness; SARI, severe acute respiratory illness; RTI, respiratory tract infection; COPD, chronic obstructive pulmonary disease; AECOPD, acute exacerbation of chronic obstructive pulmonary disease; LRTI, lower respiratory tract infection; CAP, community-acquired pneumonia; CCU, critical care unit; MV, mechanical ventilation; ARTI, acute respiratory tract infection

**S4 Table. Population characteristics of included studies.**

| Author (year), country          | Sample size (n)        | Mean (SD) age [years]            | Median (range) age [years] | Age groups evaluated (%) [years]*                                              | Comorbidity required for inclusion     |
|---------------------------------|------------------------|----------------------------------|----------------------------|--------------------------------------------------------------------------------|----------------------------------------|
| Belongia (2018), USA[1]         | 2,257                  | NR                               | NR                         | ≥ 60 (100)                                                                     | None                                   |
| Bozio (2018), USA[2]            | 2,259                  | NR                               | 57.0 (46.0-71.0)           | > 18 (100)                                                                     | None                                   |
| Branche (2014), USA[3]          | 965                    | NR                               | NR                         | >21 (100)                                                                      | None                                   |
| Branche (2021), USA[4]          | 10,078                 | NR                               | NR                         | 18-49 (14)<br>50-64 (27)<br>≥ 65 (59)<br>65-70 (21)<br>75-84 (20)<br>≥ 85 (18) | None                                   |
| Brittain-Long (2010), Sweden[5] | Acute RTI patients:209 | NR                               | NR                         | ≥ 18 (100)                                                                     | None                                   |
|                                 | Control group: 100     | NR                               | NR                         | ≥ 18 (100)                                                                     | None                                   |
| Camargo (2008), USA[6]          | 76                     | 72.0 (NR)                        | NR                         | ≥ 50 (100)                                                                     | COPD                                   |
| Carrat (2006), France[7]        | 122                    | 69.0 (NR)                        | NR                         | NR                                                                             | Chronic cardiac or pulmonary disorders |
| Charles (2008), Australia[8]    | 885                    | NR                               | NR                         | > 18 (100)                                                                     | None                                   |
| Chasqueira (2018), Portugal[9]  | 188                    | Men: 83 (9.2)<br>Women: 85 (7.2) | NR                         | NR                                                                             | None                                   |
| Ciotti (2020), Italy[10]        | 537                    | NR                               | NR                         | 18-45 (NR)<br>46-64 (NR)<br>≥ 65 (NR)                                          | None                                   |
| Civljak (2019), Croatia[11]     | 182                    | NR                               | 66.0 (19.0 - 94.0)         | ≥ 18 (100)                                                                     | None                                   |
| Creer (2005), UK[12]            | LRTI patients: 80      | 49.9 (19.7)                      | NR (18.0-90.0)             | ≥ 18 (100)                                                                     | None                                   |
|                                 | Control group: 49      | 49.7 (17.3)                      | NR (22.0-83.0)             | ≥ 18 (100)                                                                     | None                                   |
| De Francesco (2021), Italy[13]  | Pre-pandemic: 10,121   | 65.1 (NR)                        | NR                         | 18-44 (13.2)<br>56-64 (29.7)<br>65-79 (35.1)<br>≥80 (21.6)                     | None                                   |
|                                 | During pandemic: 2,362 | 63.5 (NR)                        | NR                         | 18-44 (11.0)<br>56-64 (39.7)<br>65-79 (35.4)<br>≥80 (13.6)                     | None                                   |

|                                  |                             |             |                  |                                                             |                                                     |
|----------------------------------|-----------------------------|-------------|------------------|-------------------------------------------------------------|-----------------------------------------------------|
| De Serres (2009), Canada[14]     | 108                         | NR          | NR               | 50–59 (14.0)<br>60–69 (29.0)<br>≥ 70 (57.0)                 | COPD                                                |
| Descamps (2021), France[15]      | 1,428                       | 68.0        | NR (19.0 - 98.0) | <65 (NR)<br>≥65 (NR)                                        | None                                                |
| Diaz-Decaro (2018), USA[16]      | 52                          | NR          | NR               | <65 (22.7)<br>65-85 (46.0)<br>85+ (31.3)                    | None                                                |
| Dimopoulos (2012), Greece[17]    | 200                         | 69.7 (9.1)  | NR               | ≥ 18 (100)                                                  | COPD/AECOPD                                         |
| Falsey (2005), USA[18]           | Healthy elderly adults: 608 | 75.0 (6.0)  | NR               | ≥ 65 (100)                                                  | None                                                |
|                                  | High risk adults: 540       | 70.0 (11.0) | NR               | ≥ 21 (100)                                                  | Congestive heart failure/ chronic pulmonary disease |
| Falsey (2006), USA[19]           | Respiratory cases: 146      | 42 (14)     | NR               | ≥18 (100)                                                   | None                                                |
|                                  | Control subjects: 158       | 44 (15)     | NR               | ≥ 18 (100)                                                  | None                                                |
| Falsey (2008), USA[20]           | 382                         | 84.9 (NR)   | NR (65–102)      | ≥65 (100)                                                   | None                                                |
| Falsey (2014), Multi-country[21] | 553                         | 72.8 (5.5)  | NR               | 65-69 (32.2)<br>70-74 (32.7)<br>75-79 (22.4)<br>≥ 80 (12.7) | None                                                |
| Galli (2020), Italy[22]          | Self-sampled: 132           | NR          | 38.8 (IQR: 26.5) | ≥ 18 (100)                                                  | None                                                |
|                                  | GP sampled: 132             | NR          | 43.4 (IQR: 17.9) | ≥ 18 (100)                                                  | None                                                |
| Gaymard (2018), France[23]       | 20,359                      | NR          | NR               | > 20 - ≤ 65 (25.0)<br>> 65 (21.0)                           | None                                                |
| Gimferrer (2019), Spain[24]      | 31,692                      | NR          | NR               | > 64 (100)                                                  | None                                                |
| Glezen (2000), USA[25]           | 1029                        | NR          | NR               | 18-44 (28.8)<br>45-64 (45.6)<br>≥65 (25.6)                  | None/chronic underlying conditions                  |
| Hall (2001), USA[26]             | 2,960                       | 30.0 (NR)   | NR               | 18-60 (100)                                                 | None                                                |
| Hause (2019), USA[27]            | 77                          | NR          | NR               | >18 (100)                                                   | None                                                |
| Hirve (2020), Multi-country[28]  | 22,221                      | NR          | NR               | 18-64 (NR)<br>≥ 65 (NR)                                     | None                                                |
| Hutchinson (2007), Australia[29] | 148                         | 72.0 (NR)   | NR (49.0-85.0)   | 49-85 (100)                                                 | COPD                                                |

|                                                 |        |             |                                            |                                                             |      |
|-------------------------------------------------|--------|-------------|--------------------------------------------|-------------------------------------------------------------|------|
| Jackson (2021), USA[30]                         | 2,767  | NR          | NR                                         | 18-30 (12.5)<br>31-49 (23.2)<br>50-64 (20.5)<br>65+ (18.8)  | None |
| Jain (2015), USA[31]                            | 2,320  | NR          | 57.0 (46.0-71.0)                           | 18-49 (30.0)<br>50-64 (34.0)<br>65-79 (22.0)<br>≥ 80 (14.0) | None |
| Jeannoel (2019), France[32]                     | 14,792 | NR          | NR                                         | ≥18 (100)                                                   | None |
| Johnstone (2008),<br>Canada[33]                 | 193    | NR          | 71.0 (58.0 - 80.0)                         | ≥ 18 (NR)                                                   | None |
| Johnstone (2014),<br>Canada[34]                 | 269    | NR          | NR                                         | ≥ 65 (NR)                                                   | None |
| Juretschko (2017), USA[35]                      | 2,479  | NR          | NR                                         | 21-65 (34.1)<br>> 65 (29.5)                                 | None |
| Korsten (2021), Belgium,<br>UK, Netherlands[36] | 1,040  | NR          | 75.0 (60.0-100.0)                          | ≥ 60 (100)<br>>75 (54)                                      | None |
| Leli (2021), Italy[37]                          | 572    | NR          | ≥ 18 - < 65: 52 (43-57)<br>≥ 65: 73(70-79) | ≥ 18 - < 65 (35.0)<br>≥ 65 (30.6)                           | None |
| Loubet (2017), France[38]                       | 1,452  | NR          | 70 .0 (54.0 – 82.0)                        | ≥ 18 (100)                                                  | None |
| Louie (2005), USA[39]                           | 266    | 38.7 (15.1) | 38.0 (28.0-44.0)                           | ≥ 18 (100)                                                  | None |
| Malosh (2017), USA[40]                          | 1,259  | NR          | NR                                         | 18-49 (29.5)<br>50-64 (36.6)<br>≥65 (33.8)                  | None |
| Marcos (2006), Spain[41]                        | 198    | NR          | 70.0 (49.0-79.0)                           | Adults                                                      | None |
| McClure (2014), USA[42]                         | 20,453 | 63.7 (12.1) | 60.3 (NR)                                  | 50–59 (48.7)<br>60–69 (21.9)<br>≥70 (29.4)                  | None |
| Pellegrinelli (2020), Italy[43]                 | 1,047  | NR          | NR                                         | 46-65 (23.8)<br>> 65 (11.9)                                 | None |
| Poole (2020), UK[44]                            | 856    | NR          | NR                                         | ≥ 18 (100)                                                  | None |
| Prasad (2020), New<br>Zealand[45]               | 4,600  | NR          | NR                                         | 18–49 (NR)<br>50–64 (NR)<br>65-80 (NR)<br>≥ 80 (NR)         | None |

|                                          |                                   |             |                  |                                                           |                           |
|------------------------------------------|-----------------------------------|-------------|------------------|-----------------------------------------------------------|---------------------------|
| Prasad (2021), New Zealand[46]           | 3,875                             | NR          | NR               | 18-49 (35.3)<br>50-64 (29.1)<br>65-80 (35.6)              | Chronic medical condition |
| Price (2019), Australia[47]              | 33,652                            | NR          | 45.3 (NR)        | 20-64 (51.3)<br>65 (23.1)                                 | None                      |
| Reckziegel (2020), Germany (unclear)[48] | Immunocompromised: 225            | NR          | 46.2 (NR)        | Adults (n = 188)                                          | Immunocompromised         |
|                                          | Immunocompetent: 266              | NR          | 57.2 (NR)        | Adults (n = 167)                                          | None                      |
| Saez-Lopez (2019), Portugal[49]          | 7,085                             | NR          | NR               | ≥ 65 (n = 951)                                            | None                      |
| Saez-Lopez (2019), Portugal[50]          | 20,670                            | NR          | NR               | 45-64 (n = 3,830)<br>≥ 65 (n = 5,099)                     | None                      |
| Self (2016), USA[51]                     | Asymptomatic adults: 759          | NR          | 54.0 (41.0–65.0) | ≥ 18 (n = 238)                                            | None                      |
|                                          | CAP adults: 1,024                 | NR          | 59.0 (50.0–73.0) | ≥ 18 (n = 192)                                            | None                      |
| Shorr (2018), USA[52]                    | 364                               | 58.2 (15.2) | NR               | ≥ 18 (100)                                                | None                      |
| Smithgall (2020), USA[53]                | Hospitalised adults: 40,461 tests | NR          | NR               | ≥ 18 (NR)                                                 | None                      |
|                                          | Community adults: 1,805 tests     | NR          | NR               | ≥ 18 (NR)                                                 | None                      |
| Stamm (2021), Germany[54]                | 14,946                            | NR          | NR               | Adults (100)                                              | None                      |
| Subissi (2020), Belgium[55]              | 508                               | NR          | NR               | ≥ 65 (25.0)                                               | None                      |
| Subissi (2021), Belgium[56]              | ILI surveillance: 1,791           | NR          | NR               | ≥ 65 (n = 124)                                            | None                      |
|                                          | SARI surveillance: 4,774          | NR          | NR               | ≥ 65 (n = 2,105)                                          | None                      |
| Sumino (2010)[57]                        | 283                               | 55 (15)     | NR               | Adults (100)                                              | None                      |
| Sundaram (2014), USA[58]                 | 2,225                             | 64.3 (10.7) | NR               | 50-64 (55.4)<br>65-79 (33.7)<br>≥ 80 (10.9)               | None†                     |
| Tanner (2012), UK[59]                    | 4,821                             | NR          | NR               | 25-44 (NR)<br>45-64 (NR)<br>65+ (NR)                      | None                      |
| Tramuto (2021), Italy[60]                | 9,584                             | NR          | 10.0 (IQR: 41.0) | 19–34 (7.5)<br>35–49 (9.3)<br>50–64 (11.1)<br>≥ 65 (11.0) | None                      |
| Tsagarakis (2018), Greece[61]            | 656                               | NR          | 7.0 (0.1–92.0)   | ≥ 18 - < 45 (NR)<br>≥ 45 - < 65 (NR)<br>≥ 65 (NR)         | None                      |

|                                  |                                       |           |                  |                                             |                                                                       |
|----------------------------------|---------------------------------------|-----------|------------------|---------------------------------------------|-----------------------------------------------------------------------|
| Ursic (2016), Slovenia[62]       | Nursing home residents: 90            | NR        | 84.0 (79.8–88.8) | NR                                          | None                                                                  |
|                                  | Nursing home staff: 42                | NR        | 38.2 (33.5–46.1) | NR                                          | None                                                                  |
| Van Beek (2017), Netherlands[63] | 2011-2012 ILI cases: 141              | 68.8 (NR) | NR               | ≥ 60 (100)                                  | None                                                                  |
|                                  | 2012-2013 ILI cases: 260              | 70.1 (NR) | NR               | ≥ 60 (100)                                  | None                                                                  |
|                                  | 2012-2013 Controls: 340               | 73.8 (NR) | NR               | ≥ 60 (100)                                  | None                                                                  |
| Varghese (2018), Australia[64]   | 5,031                                 | NR        | NR               | 20-49 (65.2)<br>50-64 (22.6)<br>≥ 65 (12.3) | None                                                                  |
| Vos (2018), Netherlands[65]      | 13,577                                | NR        | NR               | 45–65 (NR)<br>> 65–75 (NR)<br>> 75 (NR)     | None                                                                  |
| Walsh (2004), USA[66]            | 1999-2000 healthy elderly adults: 216 | NR        | NR               | ≥65 (100)                                   | NR                                                                    |
|                                  | 2000-2001 healthy elderly adults: 289 | NR        | NR               | ≥65 (100)                                   | NR                                                                    |
|                                  | 1999-2000 high risk adults: 204       | NR        | NR               | ≥21 (100)                                   | Symptomatic congestive heart failure or symptomatic pulmonary disease |
|                                  | 2000-2001 high risk adults: 265       | NR        | NR               | ≥21 (100)                                   | Symptomatic congestive heart failure or symptomatic pulmonary disease |
|                                  | 1999-2000 hospitalised adults: 315    | NR        | NR               | ≥65 (100)                                   | NR                                                                    |
|                                  | 2000-2001 hospitalised adults: 310    | NR        | NR               | ≥65 (100)                                   | NR                                                                    |
| Wansaula (2016), USA[67]         | 332                                   | NR        | 63.0 (0.0-97.0)  | 25-49 (20.0)<br>50-64 (24.0)<br>≥ 65 (47.0) | None                                                                  |
| Weinberger (2018), Germany[68]   | 975                                   | NR        | 50.2 (18.0–87.8) | ≥ 18 (100)                                  | None                                                                  |
| Widmer (2012), USA[69]           | 508                                   | NR        | 66.0 (58.0-78.0) | 50-64 (44.5)<br>≥ 65 (55.5)                 | None                                                                  |
| Widmer (2014), USA[70]           | 1,248                                 | NR        | 51.1 (NR)        | 18-49 (48.4)<br>≥ 50 (51.6)                 | None                                                                  |

|                       |       |    |    |                         |      |
|-----------------------|-------|----|----|-------------------------|------|
| Zambon (2001), UK[71] | 2,226 | NR | NR | 45-65 (NR)<br>≥ 65 (NR) | None |
|-----------------------|-------|----|----|-------------------------|------|

Abbreviations: AECOPD, acute exacerbation of chronic obstructive pulmonary disease; CAP, community acquired pneumonia; COPD, chronic obstructive pulmonary disease; IQR, interquartile range; NR, not reported; SD, standard deviation \* Children or adolescents were also evaluated in some studies †During the 2004-2005 season, patients aged 50-64 were eligible if they had at least 1 high-risk chronic medical condition.



S1 File. PRISMA 2009 Checklist.

| Section/topic             | #  | Checklist item                                                                                                                                                                                                                                                                                              | Reported on page #                   |
|---------------------------|----|-------------------------------------------------------------------------------------------------------------------------------------------------------------------------------------------------------------------------------------------------------------------------------------------------------------|--------------------------------------|
| <b>TITLE</b>              |    |                                                                                                                                                                                                                                                                                                             |                                      |
| Title                     | 1  | Identify the report as a systematic review, meta-analysis, or both.                                                                                                                                                                                                                                         | N.A. study design reported in page 5 |
| <b>ABSTRACT</b>           |    |                                                                                                                                                                                                                                                                                                             |                                      |
| Structured summary        | 2  | Provide a structured summary including, as applicable: background; objectives; data sources; study eligibility criteria, participants, and interventions; study appraisal and synthesis methods; results; limitations; conclusions and implications of key findings; systematic review registration number. | Page 2-3                             |
| <b>INTRODUCTION</b>       |    |                                                                                                                                                                                                                                                                                                             |                                      |
| Rationale                 | 3  | Describe the rationale for the review in the context of what is already known.                                                                                                                                                                                                                              | Page 3-4                             |
| Objectives                | 4  | Provide an explicit statement of questions being addressed with reference to participants, interventions, comparisons, outcomes, and study design (PICOS).                                                                                                                                                  | Page 4-5                             |
| <b>METHODS</b>            |    |                                                                                                                                                                                                                                                                                                             |                                      |
| Protocol and registration | 5  | Indicate if a review protocol exists, if and where it can be accessed (e.g., Web address), and, if available, provide registration information including registration number.                                                                                                                               | Page 5                               |
| Eligibility criteria      | 6  | Specify study characteristics (e.g., PICOS, length of follow-up) and report characteristics (e.g., years considered, language, publication status) used as criteria for eligibility, giving rationale.                                                                                                      | Page 5-6                             |
| Information sources       | 7  | Describe all information sources (e.g., databases with dates of coverage, contact with study authors to identify additional studies) in the search and date last searched.                                                                                                                                  | Page 5                               |
| Search                    | 8  | Present full electronic search strategy for at least one database, including any limits used, such that it could be repeated.                                                                                                                                                                               | Page 5 – S1 and S2 tables            |
| Study selection           | 9  | State the process for selecting studies (i.e., screening, eligibility, included in systematic review, and, if applicable, included in the meta-analysis).                                                                                                                                                   | Page 5-6                             |
| Data collection process   | 10 | Describe method of data extraction from reports (e.g., piloted forms, independently, in duplicate) and any processes for obtaining and confirming data from investigators.                                                                                                                                  | Page 5-6                             |
| Data items                | 11 | List and define all variables for which data were sought (e.g., PICOS, funding sources) and any assumptions and simplifications made.                                                                                                                                                                       | Page 6                               |

|                                    |    |                                                                                                                                                                                                                        |                                       |
|------------------------------------|----|------------------------------------------------------------------------------------------------------------------------------------------------------------------------------------------------------------------------|---------------------------------------|
| Risk of bias in individual studies | 12 | Describe methods used for assessing risk of bias of individual studies (including specification of whether this was done at the study or outcome level), and how this information is to be used in any data synthesis. | N.A. justification provided in page 6 |
| Summary measures                   | 13 | State the principal summary measures (e.g., risk ratio, difference in means).                                                                                                                                          | N.A.                                  |
| Synthesis of results               | 14 | Describe the methods of handling data and combining results of studies, if done, including measures of consistency (e.g., $I^2$ ) for each meta-analysis.                                                              | N.A. qualitative synthesis only       |

| Section/topic                 | #  | Checklist item                                                                                                                                                                                           | Reported on page #                               |
|-------------------------------|----|----------------------------------------------------------------------------------------------------------------------------------------------------------------------------------------------------------|--------------------------------------------------|
| Risk of bias across studies   | 15 | Specify any assessment of risk of bias that may affect the cumulative evidence (e.g., publication bias, selective reporting within studies).                                                             | N.A.                                             |
| Additional analyses           | 16 | Describe methods of additional analyses (e.g., sensitivity or subgroup analyses, meta-regression), if done, indicating which were pre-specified.                                                         | N.A.                                             |
| <b>RESULTS</b>                |    |                                                                                                                                                                                                          |                                                  |
| Study selection               | 17 | Give numbers of studies screened, assessed for eligibility, and included in the review, with reasons for exclusions at each stage, ideally with a flow diagram.                                          | Page 7                                           |
| Study characteristics         | 18 | For each study, present characteristics for which data were extracted (e.g., study size, PICOS, follow-up period) and provide the citations.                                                             | Page 7 – S1 Table                                |
| Risk of bias within studies   | 19 | Present data on risk of bias of each study and, if available, any outcome level assessment (see item 12).                                                                                                | N.A.                                             |
| Results of individual studies | 20 | For all outcomes considered (benefits or harms), present, for each study: (a) simple summary data for each intervention group (b) effect estimates and confidence intervals, ideally with a forest plot. | Table 2-3- Page 10-20                            |
| Synthesis of results          | 21 | Present results of each meta-analysis done, including confidence intervals and measures of consistency.                                                                                                  | N.A. synthesis of results provided in page 10-20 |
| Risk of bias across studies   | 22 | Present results of any assessment of risk of bias across studies (see Item 15).                                                                                                                          | N.A.                                             |
| Additional analysis           | 23 | Give results of additional analyses, if done (e.g., sensitivity or subgroup analyses, meta-regression [see Item 16]).                                                                                    | Table 3                                          |
| <b>DISCUSSION</b>             |    |                                                                                                                                                                                                          |                                                  |
| Summary of evidence           | 24 | Summarize the main findings including the strength of evidence for each main outcome; consider their relevance to key groups (e.g., healthcare providers, users, and policy makers).                     | Page 20 -22                                      |

|                |    |                                                                                                                                                               |                     |
|----------------|----|---------------------------------------------------------------------------------------------------------------------------------------------------------------|---------------------|
| Limitations    | 25 | Discuss limitations at study and outcome level (e.g., risk of bias), and at review-level (e.g., incomplete retrieval of identified research, reporting bias). | Page 22-24          |
| Conclusions    | 26 | Provide a general interpretation of the results in the context of other evidence, and implications for future research.                                       | Page 24-25          |
| <b>FUNDING</b> |    |                                                                                                                                                               |                     |
| Funding        | 27 | Describe sources of funding for the systematic review and other support (e.g., supply of data); role of funders for the systematic review.                    | Provided separately |

From: Moher D, Liberati A, Tetzlaff J, Altman DG, The PRISMA Group (2009). Preferred Reporting Items for Systematic Reviews and Meta-Analyses: The PRISMA Statement. PLoS Med 6(7): e1000097. doi:10.1371/journal.pmed1000097

For more information, visit: [www.prisma-statement.org](http://www.prisma-statement.org).

## References

1. Belongia EA, King JP, Kieke BA, Pluta J, Al-Hilli A, Meece JK, et al. Clinical Features, Severity, and Incidence of RSV Illness During 12 Consecutive Seasons in a Community Cohort of Adults  $\geq 60$  Years Old. *Open forum infect.* 2018;5(12):ofy316.
2. Bozio CH, Flanders WD, Finelli L, Bramley AM, Reed C, Gandhi NR, et al. Use of Multiple Imputation to Estimate the Proportion of Respiratory Virus Detections Among Patients Hospitalized With Community-Acquired Pneumonia. *Open forum infect.* 2018;5(4):ofy061.
3. Branche AR, Walsh EE, Formica MA, Falsey AR. Detection of respiratory viruses in sputum from adults by use of automated multiplex PCR. *J Clin Microbiol.* 2014;52(10):3590-6.
4. Branche AR, Saiman L, Walsh EE, Falsey AR, Sieling WD, Greendyke W, et al. Incidence of Respiratory Syncytial Virus Infection among Hospitalized Adults, 2017-2020. *Clinical Infectious Diseases.* 2021;09:09.
5. Brittain-Long R, Westin J, Olofsson S, Lindh M, Andersson LM. Prospective evaluation of a novel multiplex real-time PCR assay for detection of fifteen respiratory pathogens-duration of symptoms significantly affects detection rate. *J Clin Virol.* 2010;47(3):263-7.
6. Camargo CA, Jr., Ginde AA, Clark S, Cartwright CP, Falsey AR, Niewoehner DE. Viral pathogens in acute exacerbations of chronic obstructive pulmonary disease. *Intern Emerg Med.* 2008;3(4):355-9.
7. Carrat F, Leruez-Ville M, Tonnellier M, Baudel JL, Deshayes J, Meyer P, et al. A virologic survey of patients admitted to a critical care unit for acute cardiorespiratory failure. *Intensive Care Med.* 2006;32(1):156-9.
8. Charles PG, Whitby M, Fuller AJ, Stirling R, Wright AA, Korman TM, et al. The etiology of community-acquired pneumonia in Australia: why penicillin plus doxycycline or a macrolide is the most appropriate therapy. *Clin Infect Dis.* 2008;46(10):1513-21.
9. Chasqueira MJ, Paixao P, Rodrigues ML, Piedade C, Caires I, Palmeiro T, et al. Respiratory infections in elderly people: Viral role in a resident population of elderly care centers in Lisbon, winter 2013-2014. *Int J Infect Dis.* 2018;69:1-7.
10. Ciotti M, Maurici M, Santoro V, Coppola L, Sarmati L, De Carolis G, et al. Viruses of Respiratory Tract: an Observational Retrospective Study on Hospitalized Patients in Rome, Italy. *Microorganisms.* 2020;8(4):01.
11. Civljak R, Tot T, Falsey AR, Huljev E, Vranes J, Ljubin-Sternak S. Viral pathogens associated with acute respiratory illness in hospitalized adults and elderly from Zagreb, Croatia, 2016 to 2018. *J Med Virol.* 2019;91(7):1202-9.
12. Creer DD, Dilworth JP, Gillespie SH, Johnston AR, Johnston SL, Ling C, et al. Aetiological role of viral and bacterial infections in acute adult lower respiratory tract infection (LRTI) in primary care. *Thorax.* 2006;61(1):75-9.
13. De Francesco MA, Pollara C, Gargiulo F, Giacomelli M, Caruso A. Circulation of Respiratory Viruses in Hospitalized Adults before and during the COVID-19 Pandemic in Brescia, Italy: A Retrospective Study. *Int J Environ Res Public Health.* 2021;18(18):09.
14. De Serres G, Lampron N, La Forge J, Rouleau I, Bourbeau J, Weiss K, et al. Importance of viral and bacterial infections in chronic obstructive pulmonary disease exacerbations. *J Clin Virol.* 2009;46(2):129-33.
15. Descamps A, Lenzi N, Galtier F, Laine F, Lesieur Z, Vanhems P, et al. In-hospital and midterm out-hospital complications of adults hospitalised with respiratory syncytial virus infection in France, 2017-2019: an observational study. *Eur Respir J.* 2021;26:26.
16. Diaz-Decaro JD, Launer B, McKinnell JA, Singh R, Dutciuc TD, Green NM, et al. Bayesian evidence and epidemiological implications of environmental contamination from acute respiratory infection in long-term care facilities. *Epidemiology & Infection.* 2018;146(7):832-8.
17. Dimopoulos G, Lerikou M, Tsiodras S, Chranioti A, Perros E, Anagnostopoulou U, et al. Viral epidemiology of acute exacerbations of chronic obstructive pulmonary disease. *Pulm Pharmacol Ther.* 2012;25(1):12-8.

18. Falsey AR, Hennessey PA, Formica MA, Cox C, Walsh EE. Respiratory syncytial virus infection in elderly and high-risk adults. *N Engl J Med*. 2005;352(17):1749-59.
19. Falsey AR, Criddle MC, Walsh EE. Detection of respiratory syncytial virus and human metapneumovirus by reverse transcription polymerase chain reaction in adults with and without respiratory illness. *J Clin Virol*. 2006;35(1):46-50.
20. Falsey AR, Dallal GE, Formica MA, Andolina GG, Hamer DH, Leka LL, et al. Long-term care facilities: a cornucopia of viral pathogens. *J Am Geriatr Soc*. 2008;56(7):1281-5.
21. Falsey AR, McElhaneey JE, Beran J, van Essen GA, Duval X, Esen M, et al. Respiratory syncytial virus and other respiratory viral infections in older adults with moderate to severe influenza-like illness. *J Infect Dis*. 2014;209(12):1873-81.
22. Galli C, Pellegrinelli L, Del Castillo G, Forni G, Gandolfi CE, Mosillo M, et al. Self-Sampling of Oropharyngeal Swabs Among Healthcare Workers for Molecular Detection of Respiratory Viruses: A Valuable Approach for Epidemiological Studies and Surveillance Programs. *Front*. 2020;8:511669.
23. Gaymard A, Bouscambert-Duchamp M, Pichon M, Frobert E, Vallee J, Lina B, et al. Genetic characterization of respiratory syncytial virus highlights a new BA genotype and emergence of the ON1 genotype in Lyon, France, between 2010 and 2014. *Journal of Clinical Virology*. 2018;102:12-8.
24. Gimferrer L, Vila J, Pinana M, Andres C, Rodrigo-Pendas JA, Peremiquel-Trillas P, et al. Virological surveillance of human respiratory syncytial virus A and B at a tertiary hospital in Catalonia (Spain) during five consecutive seasons (2013-2018). *Future Microbiol*. 2019;14:373-81.
25. Glezen WP, Greenberg SB, Atmar RL, Piedra PA, Couch RB. Impact of respiratory virus infections on persons with chronic underlying conditions. *Jama*. 2000;283(4):499-505.
26. Hall CB, Long CE, Schnabel KC. Respiratory syncytial virus infections in previously healthy working adults. *Clin Infect Dis*. 2001;33(6):792-6.
27. Hause AM, Avadhanula V, Maccato ML, Pinell PM, Bond N, Santarcangelo P, et al. Clinical characteristics and outcomes of respiratory syncytial virus infection in pregnant women. *Vaccine*. 2019;37(26):3464-71.
28. Hirve S, Crawford N, Palekar R, Zhang W, Group WRs. Clinical characteristics, predictors, and performance of case definition-Interim results from the WHO global respiratory syncytial virus surveillance pilot. *Influenza other respi*. 2020;14(6):647-57.
29. Hutchinson AF, Ghimire AK, Thompson MA, Black JF, Brand CA, Lowe AJ, et al. A community-based, time-matched, case-control study of respiratory viruses and exacerbations of COPD. *Respir Med*. 2007;101(12):2472-81.
30. Jackson ML, Starita L, Kiniry E, Phillips CH, Wellwood S, Cho S, et al. Incidence of Medically Attended Acute Respiratory Illnesses Due to Respiratory Viruses Across the Life Course During the 2018/19 Influenza Season. *Clinical Infectious Diseases*. 2021;73(5):802-7.
31. Jain S, Self WH, Wunderink RG, Fakhran S, Balk R, Bramley AM, et al. Community-Acquired Pneumonia Requiring Hospitalization among U.S. Adults. *N Engl J Med*. 2015;373(5):415-27.
32. Jeannoel M, Lina G, Rasigade JP, Lina B, Morfin F, Casalegno JS. Microorganisms associated with respiratory syncytial virus pneumonia in the adult population. *European Journal of Clinical Microbiology & Infectious Diseases*. 2019;38(1):157-60.
33. Johnstone J, Majumdar SR, Fox JD, Marrie TJ. Viral infection in adults hospitalized with community-acquired pneumonia: prevalence, pathogens, and presentation. *Chest*. 2008;134(6):1141-8.
34. Johnstone J, Parsons R, Botelho F, Millar J, McNeil S, Fulop T, et al. Immune biomarkers predictive of respiratory viral infection in elderly nursing home residents. *PLoS One*. 2014;9(9):e108481.
35. Juretschko S, Mahony J, Buller RS, Manji R, Dunbar S, Walker K, et al. Multicenter Clinical Evaluation of the Luminex Aries Flu A/B & RSV Assay for Pediatric and Adult Respiratory Tract Specimens. *J Clin Microbiol*. 2017;55(8):2431-8.

36. Korsten K, Adriaenssens N, Coenen S, Butler CC, Verheij TJM, Bont LJ, et al. World Health Organization Influenza-Like Illness Underestimates the Burden of Respiratory Syncytial Virus Infection in Community-Dwelling Older Adults. *Journal of Infectious Diseases*. 2021;14:14.
37. Leli C, Di Matteo L, Gotta F, Vay D, Piceghello A, Cornaglia E, et al. Prevalence of respiratory viruses by Multiplex PCR: a four-and-a-half year retrospective study in an Italian general hospital. *Infez Med*. 2021;29(1):94-101.
38. Loubet P, Lenzi N, Valette M, Foulongne V, Krivine A, Houhou N, et al. Clinical characteristics and outcome of respiratory syncytial virus infection among adults hospitalized with influenza-like illness in France. *Clin Microbiol Infect*. 2017;23(4):253-9.
39. Louie JK, Hacker JK, Gonzales R, Mark J, Maselli JH, Yagi S, et al. Characterization of viral agents causing acute respiratory infection in a San Francisco University Medical Center Clinic during the influenza season. *Clin Infect Dis*. 2005;41(6):822-8.
40. Malosh RE, Martin ET, Callear AP, Petrie JG, Laming AS, Lamerato L, et al. Respiratory syncytial virus hospitalization in middle-aged and older adults. *Journal of Clinical Virology*. 2017;96:37-43.
41. Angeles Marcos M, Camps M, Pumarola T, Antonio Martinez J, Martinez E, Mensa J, et al. The role of viruses in the aetiology of community-acquired pneumonia in adults. *Antivir Ther*. 2006;11(3):351-9.
42. McClure DL, Kieke BA, Sundaram ME, Simpson MD, Meece JK, Sifakis F, et al. Seasonal incidence of medically attended respiratory syncytial virus infection in a community cohort of adults  $\geq 50$  years old. *PLoS One*. 2014;9(7):e102586.
43. Pellegrinelli L, Galli C, Bubba L, Cereda D, Anselmi G, Binda S, et al. Respiratory syncytial virus in influenza-like illness cases: Epidemiology and molecular analyses of four consecutive winter seasons (2014-2015/2017-2018) in Lombardy (Northern Italy). *J Med Virol*. 2020;21:21.
44. Poole S, Brendish NJ, Clark TW. SARS-CoV-2 has displaced other seasonal respiratory viruses: Results from a prospective cohort study. *J Infect*. 2020;81(6):966-72.
45. Prasad N, Newbern EC, Trenholme AA, Thompson MG, McArthur C, Wong CA, et al. The health and economic burden of respiratory syncytial virus associated hospitalizations in adults. *PLoS ONE [Electronic Resource]*. 2020;15(6):e0234235.
46. Prasad N, Walker TA, Waite B, Wood T, Trenholme AA, Baker MG, et al. Respiratory Syncytial Virus-Associated Hospitalizations Among Adults With Chronic Medical Conditions. *Clinical Infectious Diseases*. 2021;73(1):e158-e63.
47. Price OH, Sullivan SG, Sutterby C, Druce J, Carville KS. Using routine testing data to understand circulation patterns of influenza A, respiratory syncytial virus and other respiratory viruses in Victoria, Australia. *Epidemiology & Infection*. 2019;147:e221.
48. Reckziegel M, Weber-Osel C, Egerer R, Gruhn B, Kubek F, Walther M, et al. Viruses and atypical bacteria in the respiratory tract of immunocompromised and immunocompetent patients with airway infection. *European Journal of Clinical Microbiology & Infectious Diseases*. 2020;39(8):1581-92.
49. Saez-Lopez E, Pechirra P, Costa I, Cristovao P, Conde P, Machado A, et al. Performance of surveillance case definitions for respiratory syncytial virus infections through the sentinel influenza surveillance system, Portugal, 2010 to 2018. *Euro Surveill*. 2019;24(45).
50. Saez-Lopez E, Cristovao P, Costa I, Pechirra P, Conde P, Guiomar R, et al. Epidemiology and genetic variability of respiratory syncytial virus in Portugal, 2014-2018. *Journal of Clinical Virology*. 2019;121:104200.
51. Self WH, Williams DJ, Zhu Y, Ampofo K, Pavia AT, Chappell JD, et al. Respiratory Viral Detection in Children and Adults: Comparing Asymptomatic Controls and Patients With Community-Acquired Pneumonia. *J Infect Dis*. 2016;213(4):584-91.
52. Shorr AF, Fisher K, Micek ST, Kollef MH. The Burden of Viruses in Pneumonia Associated With Acute Respiratory Failure: An Underappreciated Issue. *Chest*. 2018;154(1):84-90.

53. Smithgall M, Maykowski P, Zachariah P, Oberhardt M, Vargas CY, Reed C, et al. Epidemiology, clinical features, and resource utilization associated with respiratory syncytial virus in the community and hospital. *Influenza other respi.* 2020;14(3):247-56.
54. Stamm P, Sagoschen I, Weise K, Plachter B, Munzel T, Gori T, et al. Influenza and RSV incidence during COVID-19 pandemic-an observational study from in-hospital point-of-care testing. *Med Microbiol Immunol (Berl).* 2021;210(5-6):277-82.
55. Subissi L, Bossuyt N, Reynders M, Gerard M, Dauby N, Bourgeois M, et al. Capturing respiratory syncytial virus season in Belgium using the influenza severe acute respiratory infection surveillance network, season 2018/19. *Euro Surveill.* 2020;25(39):10.
56. Subissi L, Bossuyt N, Reynders M, Gerard M, Dauby N, Lacor P, et al. Spotlight influenza: Extending influenza surveillance to detect non-influenza respiratory viruses of public health relevance: analysis of surveillance data, Belgium, 2015 to 2019. *Euro Surveill.* 2021;26(38):09.
57. Sumino KC, Walter MJ, Mikols CL, Thompson SA, Gaudreault-Keener M, Arens MQ, et al. Detection of respiratory viruses and the associated chemokine responses in serious acute respiratory illness. *Thorax.* 2010;65(7):639-44.
58. Sundaram ME, Meece JK, Sifakis F, Gasser RA, Jr., Belongia EA. Medically attended respiratory syncytial virus infections in adults aged  $\geq 50$  years: clinical characteristics and outcomes. *Clin Infect Dis.* 2014;58(3):342-9.
59. Tanner H, Boxall E, Osman H. Respiratory viral infections during the 2009-2010 winter season in Central England, UK: incidence and patterns of multiple virus co-infections. *Eur J Clin Microbiol Infect Dis.* 2012;31(11):3001-6.
60. Tramuto F, Maida CM, Di Naro D, Randazzo G, Vitale F, Restivo V, et al. Respiratory Syncytial Virus: New Challenges for Molecular Epidemiology Surveillance and Vaccination Strategy in Patients with ILI/SARI. 2021;9(11):16.
61. Tsagarakis NJ, Sideri A, Makridis P, Triantafyllou A, Stamoulakatou A, Papadogeorgaki E. Age-related prevalence of common upper respiratory pathogens, based on the application of the FilmArray Respiratory panel in a tertiary hospital in Greece. *Medicine (Baltimore).* 2018;97(22):e10903.
62. Uršič T, Miksić NG, Lusa L, Strle F, Petrovec M. Viral respiratory infections in a nursing home: a six-month prospective study. *BMC Infect Dis.* 2016;16(1):637.
63. van Beek J, Veenhoven RH, Bruin JP, van Boxtel RAJ, de Lange MMA, Meijer A, et al. Influenza-like Illness Incidence Is Not Reduced by Influenza Vaccination in a Cohort of Older Adults, Despite Effectively Reducing Laboratory-Confirmed Influenza Virus Infections. *Journal of Infectious Diseases.* 2017;216(4):415-24.
64. Varghese BM, Dent E, Chilver M, Cameron S, Stocks NP. Epidemiology of viral respiratory infections in Australian working-age adults (20-64 years): 2010-2013. *Epidemiology & Infection.* 2018;146(5):619-26.
65. Vos LM, Teirlinck AC, Lozano JE, Vega T, Donker GA, Hoepelman AI, et al. Use of the moving epidemic method (MEM) to assess national surveillance data for respiratory syncytial virus (RSV) in the Netherlands, 2005 to 2017. *Euro Surveill.* 2019;24(20).
66. Walsh EE, Peterson DR, Falsey AR. Risk factors for severe respiratory syncytial virus infection in elderly persons. *J Infect Dis.* 2004;189(2):233-8.
67. Wansaula Z, Olsen SJ, Casal MG, Golenko C, Erhart LM, Kammerer P, et al. Surveillance for severe acute respiratory infections in Southern Arizona, 2010-2014. *Influenza Other Respir Viruses.* 2016;10(3):161-9.
68. Weinberger R, Riffelmann M, Kennerknecht N, Hulse C, Littmann M, O'Brien J, et al. Long-lasting cough in an adult German population: incidence, symptoms, and related pathogens. *European Journal of Clinical Microbiology & Infectious Diseases.* 2018;37(4):665-72.
69. Widmer K, Zhu Y, Williams JV, Griffin MR, Edwards KM, Talbot HK. Rates of hospitalizations for respiratory syncytial virus, human metapneumovirus, and influenza virus in older adults. *J Infect Dis.* 2012;206(1):56-62.

70. Widmer K, Griffin MR, Zhu Y, Williams JV, Talbot HK. Respiratory syncytial virus- and human metapneumovirus-associated emergency department and hospital burden in adults. *Influenza Other Respir Viruses*. 2014;8(3):347-52.
71. Zambon MC, Stockton JD, Clewley JP, Fleming DM. Contribution of influenza and respiratory syncytial virus to community cases of influenza-like illness: an observational study. *Lancet*. 2001;358(9291):1410-6.
